# Supplementary material for: A dual promotion strategy of interface modification and ion doping for efficient and stable carbon-based planar CsPbBr3 perovskite solar cells
Source: Royal Society of Chemistry journal article supplement (doi:10.1039/d0tc04624h), 2020-01-01
Supplement: d0tc04624h1.pdf [file d0tc04624h1.pdf]

**Dual promotion strategy of interface modification and ion doping for  
efficient and stable carbon-based planar CsPbBr<sub>3</sub> perovskite solar  
cells**

Chenyang Wang,<sup>†</sup> Yongjin Long,<sup>†</sup> Xiaohui Liu,<sup>\*,†</sup> Shiqiang Fu,<sup>†</sup> Jiahao Wang,<sup>†</sup> Jing Zhang,<sup>†</sup>  
Ziyang Hu,<sup>†</sup> Yuejin Zhu<sup>\*,†,‡</sup>

<sup>†</sup> Department of Microelectronic Science and Engineering, School of Physical Science and  
Technology, Ningbo Collaborative Innovation Center of Nonlinear Calamity System of Ocean and  
Atmosphere, Ningbo University, Ningbo, 315211, China

<sup>‡</sup> School of Information Engineering, College of Science and Technology, Ningbo University,  
Ningbo, 315300, China

\* E-mail: liuxiaohui@nbu.edu.cn; zhuyuejin@nbu.edu.cn

**Table S1.** The fitting results of the equivalent circuit based on PSCs w/o or with CsBr modification.

| Devices   | $R_s$ ( $\Omega$ ) | $R_{co}$ ( $\Omega$ ) | $R_{rec}$ ( $\Omega$ ) |
|-----------|--------------------|-----------------------|------------------------|
| w/o CsBr  | 174.14             | 4.613                 | 5110.68                |
| with CsBr | 226.09             | 0.0182                | 10332.74               |

**Table S2.** Photovoltaic parameters of CsPbBr<sub>3</sub> PSCs w/o and or CsBr modified.

| Devices   | scan    | $J_{SC}$ (mA/cm <sup>2</sup> ) | $V_{OC}$ (V) | FF   | PCE (%) | HI    |
|-----------|---------|--------------------------------|--------------|------|---------|-------|
| w/o CsBr  | forward | 6.51                           | 1.04         | 0.66 | 4.47    | 0.257 |
|           | reverse | 6.57                           | 1.21         | 0.75 | 6.02    |       |
| with CsBr | forward | 6.56                           | 1.19         | 0.69 | 5.45    | 0.174 |
|           | reverse | 6.64                           | 1.21         | 0.82 | 6.60    |       |

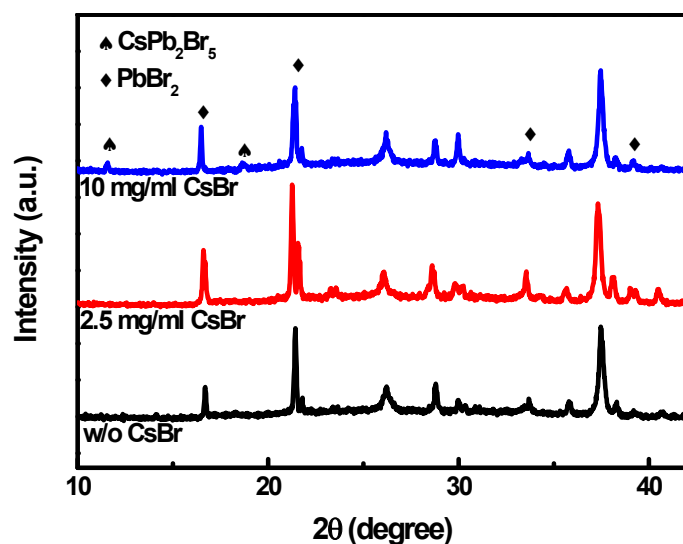

Fig. S1 XRD patterns of the PbBr<sub>2</sub> films modified with different concentration of CsBr (0, 2.5 mg/mL, 10 mg/mL).

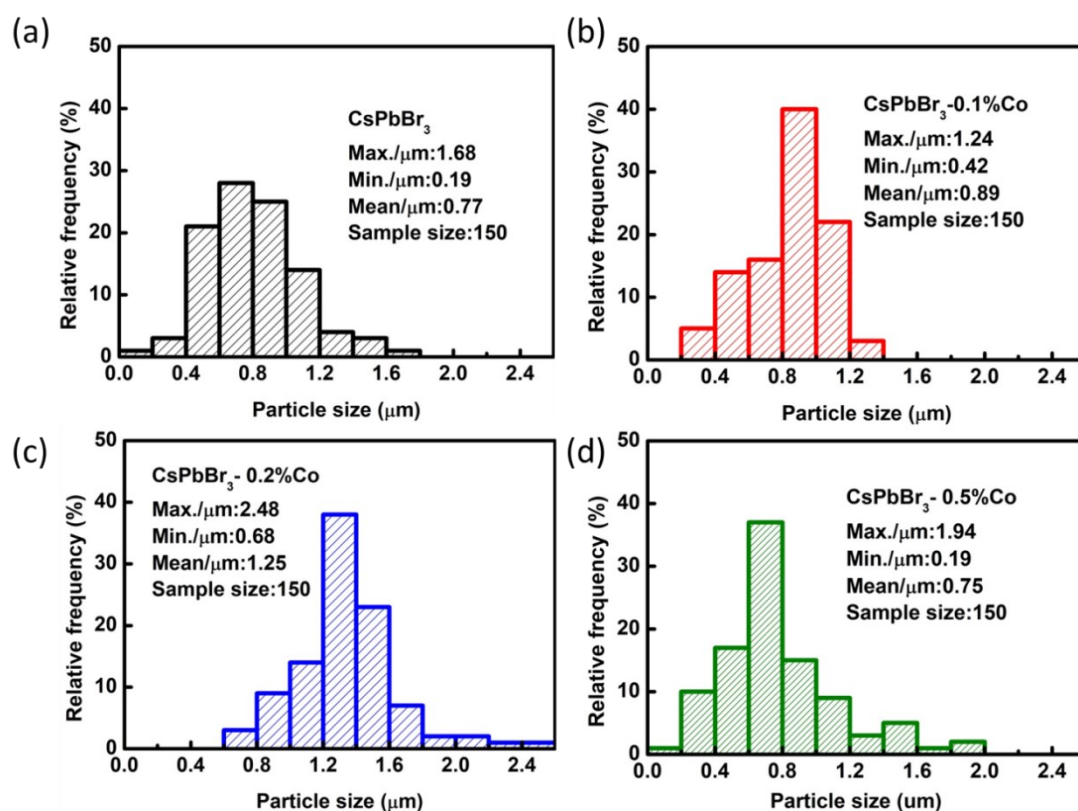

Fig. S2. Frequency distribution histogram of particle size statistics (a) CsPbBr<sub>3</sub>, (b) CsPbBr<sub>3</sub>-0.1%Co, (c) CsPbBr<sub>3</sub>-0.2%Co, (d) CsPbBr<sub>3</sub>-0.5%Co.

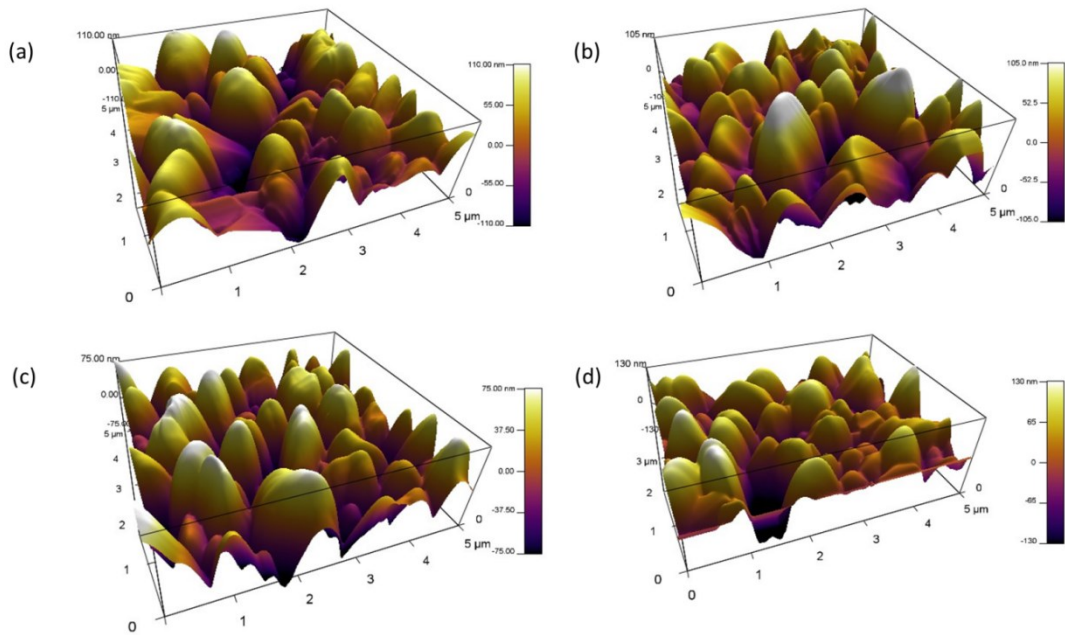

**Fig. S3.** The 3D-KPFM image of (a)  $\text{CsPbBr}_3$ , (b)  $\text{CsPbBr}_3\text{-}0.1\%\text{Co}$ , (c)  $\text{CsPbBr}_3\text{-}0.2\%\text{Co}$ , (d)  $\text{CsPbBr}_3\text{-}0.5\%\text{Co}$ .

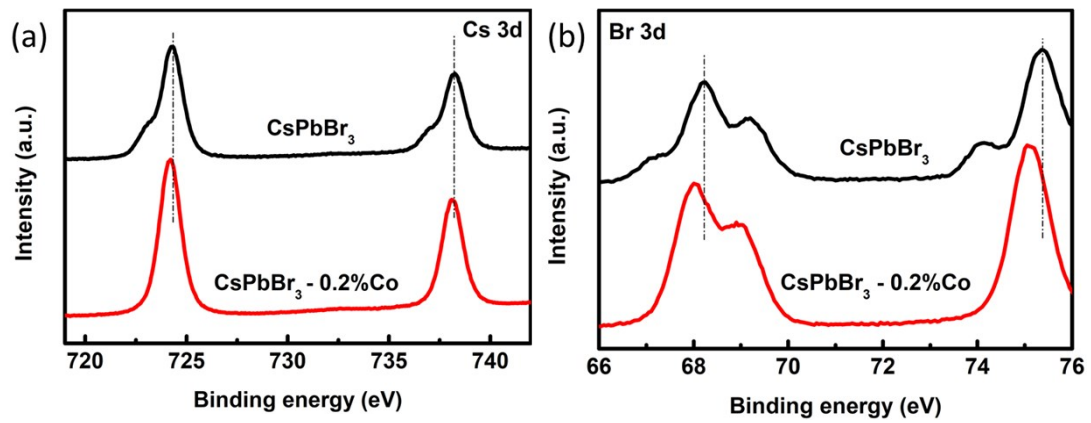

**Fig. S4.** High-resolution XPS spectra of  $\text{CsPbBr}_3$  and  $\text{CsPbBr}_3\text{-}0.2\%\text{Co}$  films at the Cs 3d and Br 3d.

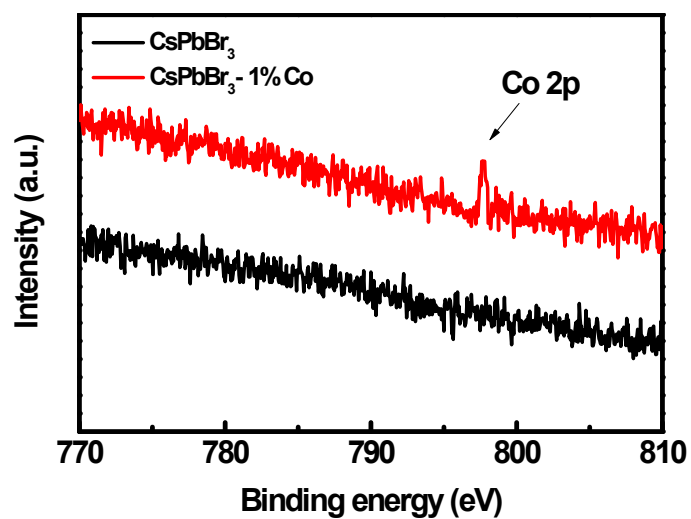

Fig. S5 High-resolution XPS spectra of CsPbBr<sub>3</sub> and CsPbBr<sub>3</sub>-1%Co films.

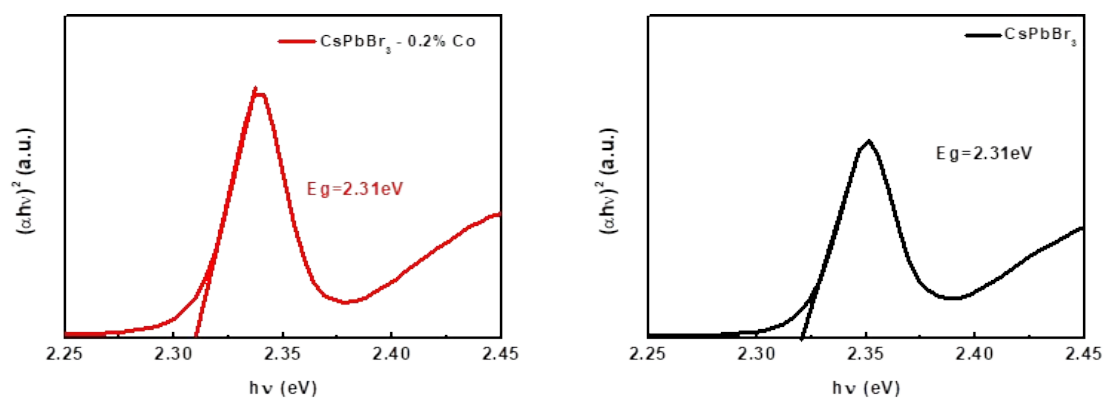

Fig. S6. Tauc plot for CsPbBr<sub>3</sub> and CsPbBr<sub>3</sub>-0.2%Co perovskite films.

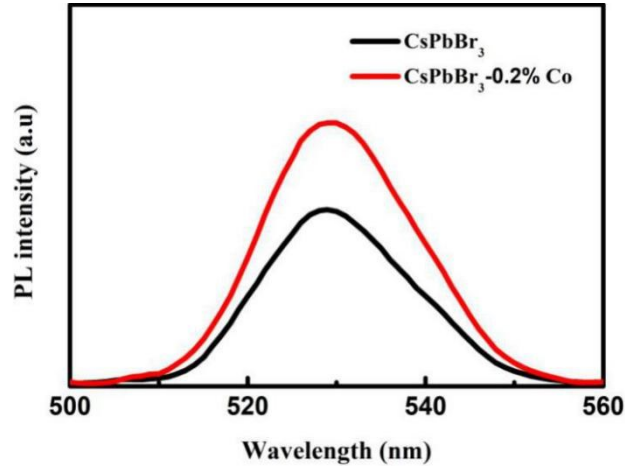

**Fig. S7.** Steady-state PL spectra of perovskite films fabricated on top of glass.

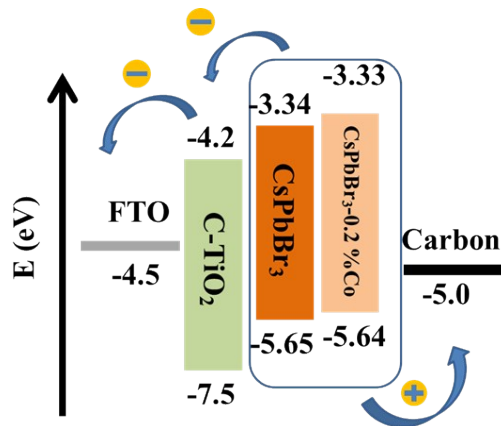

**Fig. S8.** The energy level diagrams of the functional layer of  $\text{CsPb}_{1-x}\text{Co}_x\text{Br}_3$  PSCs.
